# Supplementary material for: Excess chemical potential of thiophene in [C4MIM] [BF4, Cl, Br, CH3COO] ionic liquids, determined by molecular simulations
Source: Royal Society of Chemistry journal article supplement (doi:10.1039/d1ra04615b), 2021-01-01
Supplement: d1ra04615b1.pdf [file d1ra04615b1.pdf]

## SUPPLEMENTARY INFORMATION

### EXCESS CHEMICAL POTENTIAL OF THIOPHENE IN [C<sub>4</sub>MIM] [BF<sub>4</sub>, Cl, Br, CH<sub>3</sub>COO] IONIC LIQUIDS, DETERMINED BY MOLECULAR SIMULATIONS

*Marco V. Velarde-Salcedo<sup>a</sup>, Joel Sánchez-Badillo<sup>b</sup>, **Marco Gallo**<sup>\*c</sup> and Jorge López-Lemus<sup>a</sup>*

<sup>a</sup>Facultad de Ciencias, Universidad Autónoma del Estado de México, Instituto Literario No. 100, Col. Centro, CP 50000 Toluca, Estado de México, México.

<sup>b</sup>Facultad de Ingeniería en Tecnología de la Madera, Universidad Michoacana de San Nicolás de Hidalgo, Fco. J. Múgica S/N, Morelia, Michoacán, C. P. 58030, México.

<sup>c</sup>Tecnológico Nacional de México/ITCJ, Av. Tecnológico 1340, Cd. Juárez, Chihuahua 32500, México.

1. Structural analysis of thiophene in Ionic liquids, performed with the TRAVIS software.<sup>1,2</sup>

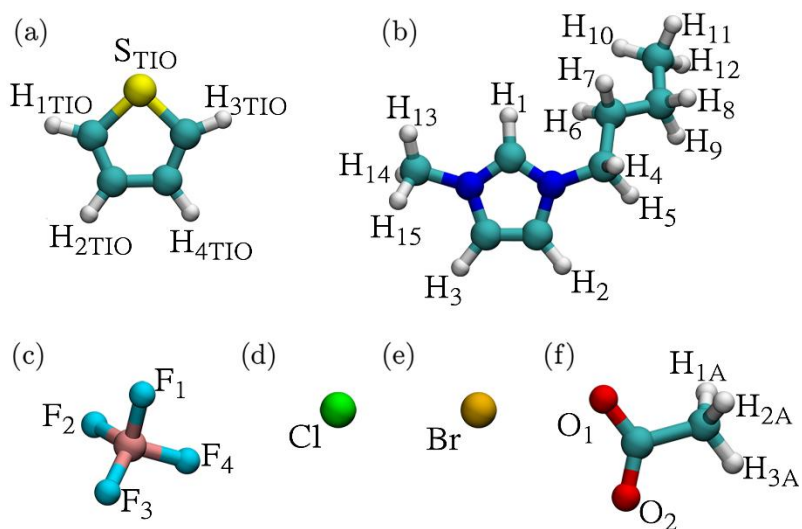

**Figure S1.** Atomic labels for (a) Thiophene, (b) 1-butyl-3-methylimidazolium ( $[C_4mim]^+$ ) cation, (c) tetrafluoroborate ( $[BF_4]^-$ ) anion, (d) chloride ( $[Cl]^-$ ) anion, (e) bromide ( $[Br]^-$ ) anion, and (f) acetate ( $[CH_3COO]^-$ ) anion.

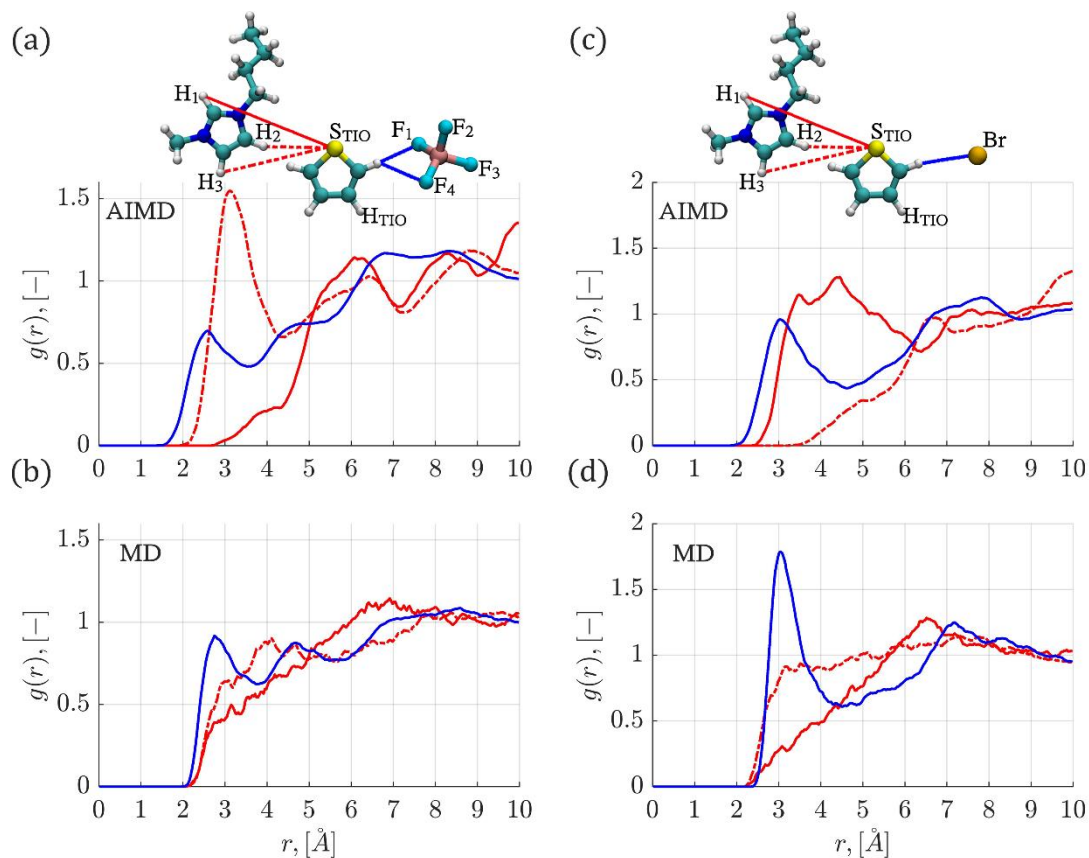

**Figure S2.** Radial distribution functions involving thiophene atoms paired with atoms from the IL ions, **(a)** AIMD simulations in the  $[C_4mim][BF_4]$  IL, **(b)** MD simulations in the  $[C_4mim][BF_4]$  IL, **(c)** AIMD simulations in the  $[C_4mim][Br]$  IL, **(d)** MD simulations in the  $[C_4mim][Br]$  IL; the solid blue line corresponds to the  $S_{TIO}$ -anion interaction, the solid red line refers to the  $S_{TIO}$ - $H_1$  interaction, and the dashed red line refers to the  $S_{TIO}$ - $H_{2,3}$  interaction.

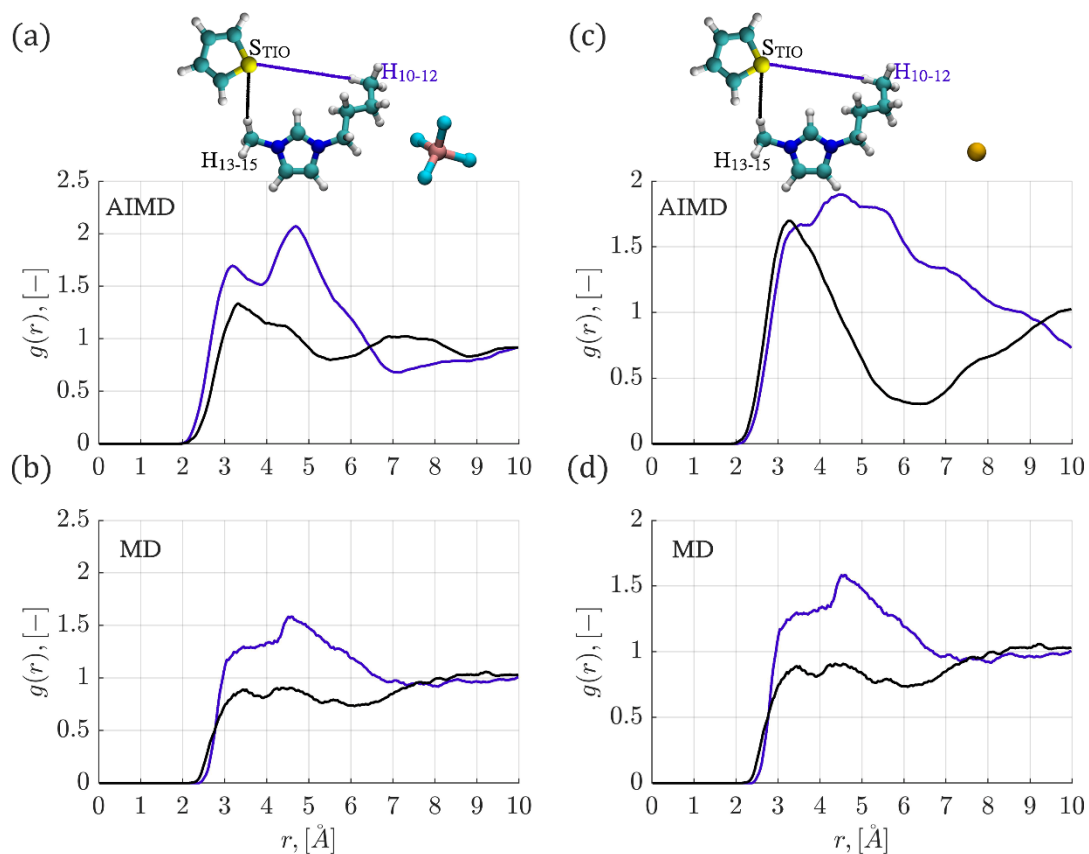

**Figure S3.** Radial distribution functions between imidazolium side chain-hydrogen atoms ( $H_{10-15}$ ) paired with the thiophene sulfur atom ( $S_{TIO}$ ), **(a)** AIMD simulations in the  $[C_4mim][BF_4]$  IL, **(b)** MD simulations in the  $[C_4mim][BF_4]$  IL, **(c)** AIMD simulations in the  $[C_4mim][Br]$  IL and **(d)** MD simulations in the  $[C_4mim][Br]$  IL; the blue line corresponds to the  $S_{TIO}-H_{10-12}$  interactions, and the black line represents the  $S_{TIO}-H_{13-15}$  interactions.

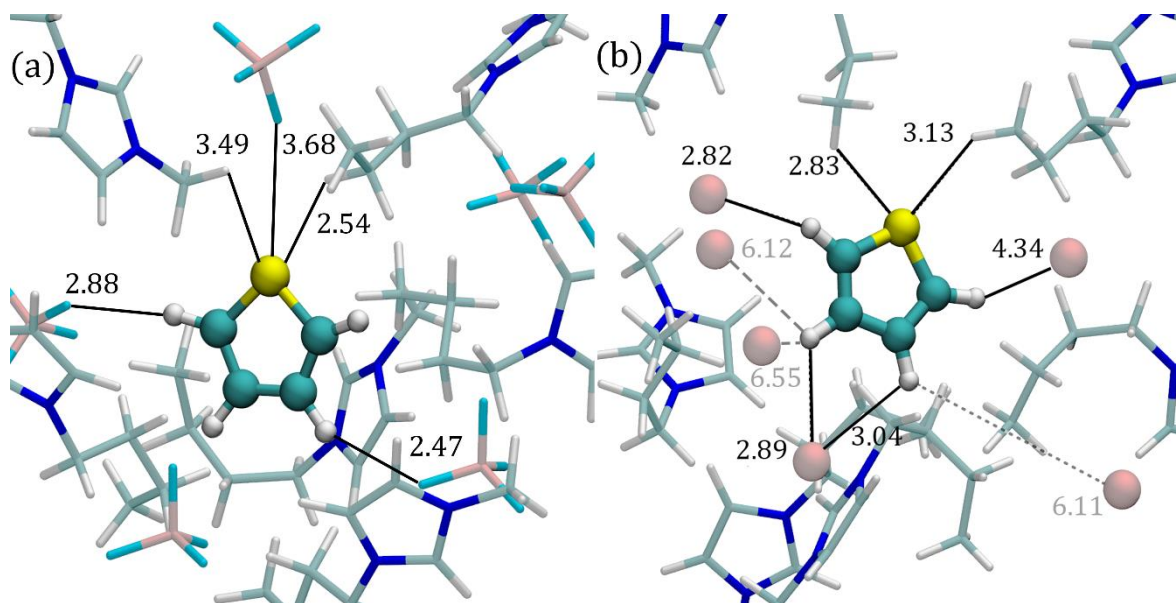

**Figure S4.** Close molecular environment for the thiophene molecule within the ILs extracted from AIMD simulations. **(a)** [C<sub>4</sub>mim][BF<sub>4</sub>] IL and **(b)** [C<sub>4</sub>mim][Br] IL. The molecular representations were created with the VMD program;<sup>3</sup> and all distances are measured in angstroms.

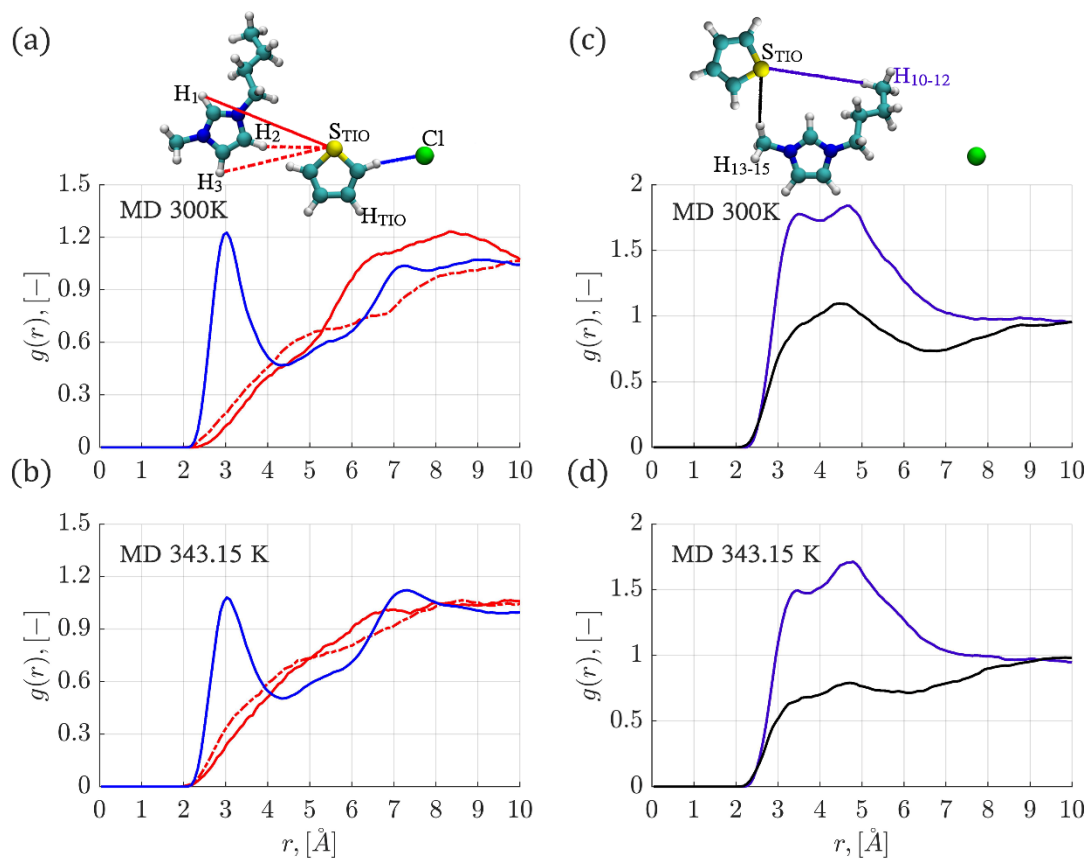

**Figure S5.** RDFs for the Thiophene-[C4mim][Cl] system, obtained at 300 K and 343.15 K.

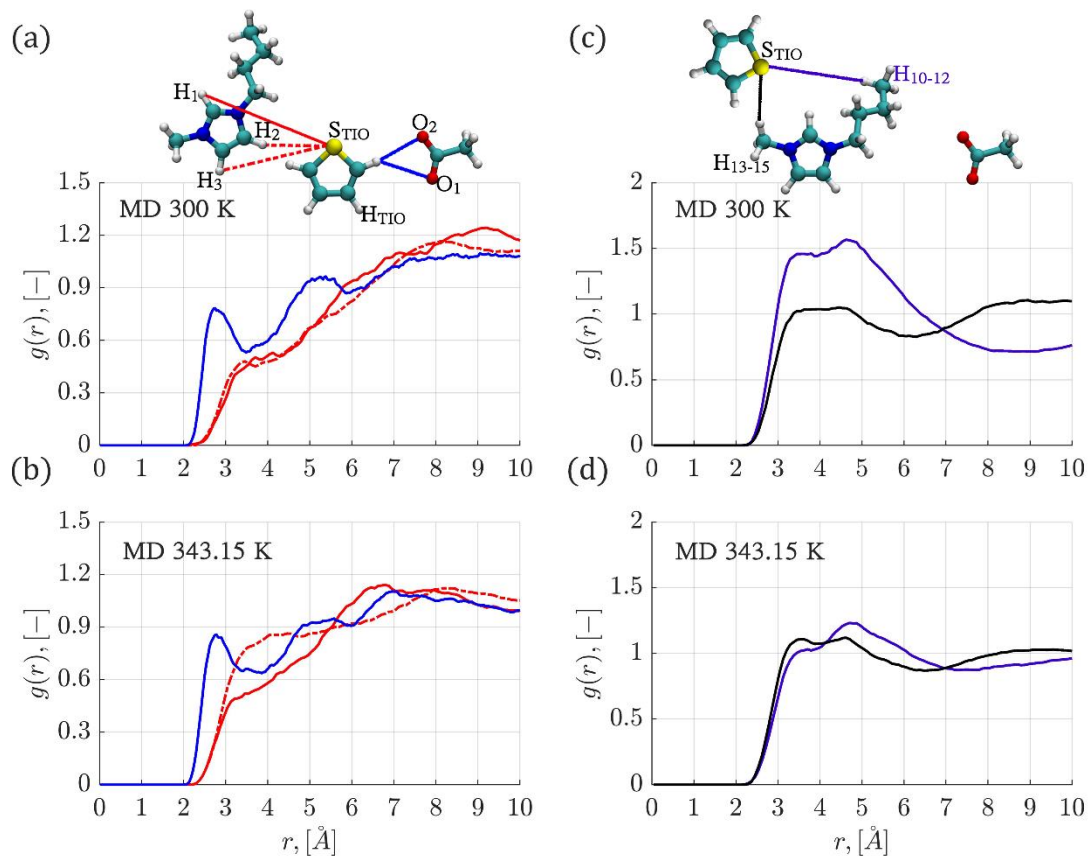

**Figure S6.** RDFs for the Thiophene-[C<sub>4</sub>mim][CH<sub>3</sub>COO] system, obtained at 300 K and 343.15 K.

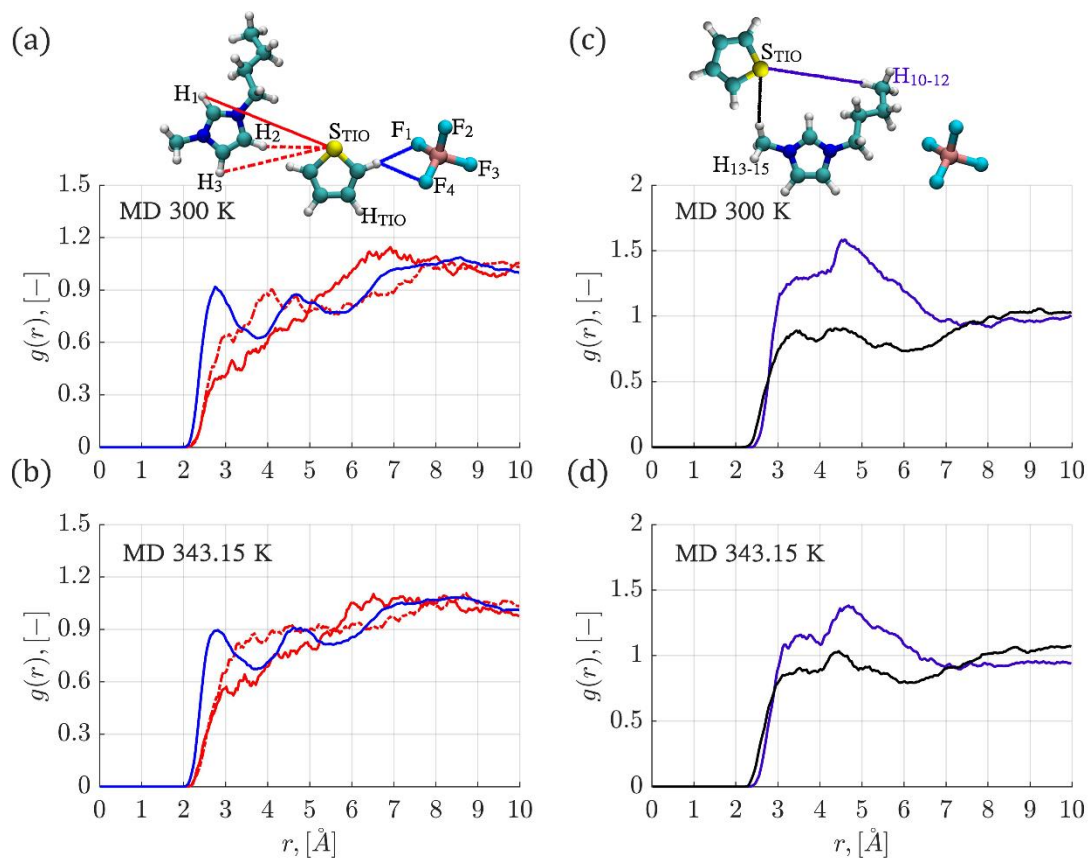

**Figure S7.** RDFs for the Thiophene- $[C_4mim][BF_4]$  system, obtained at 300 K and 343.15 K.



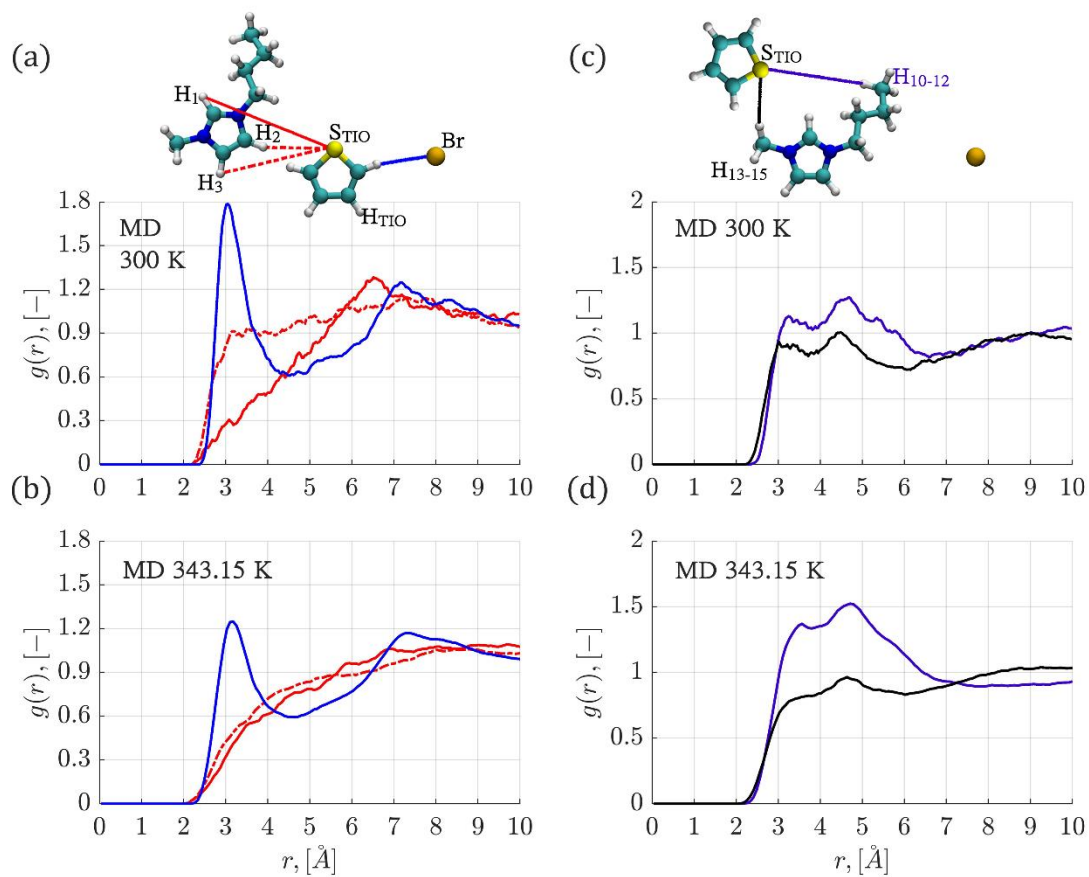

**Figure S8.** RDFs for the Thiophene-[C<sub>4</sub>mim][Br] system, obtained at 300 K and 343.15 K.

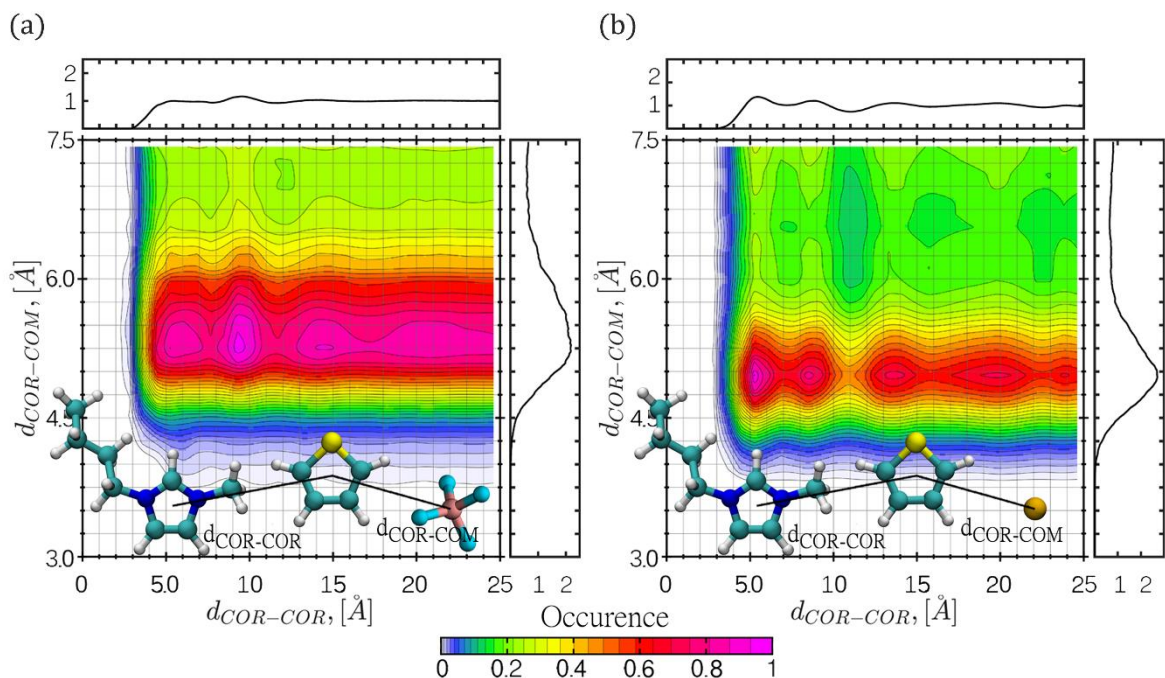

**Figure S9.** Combined distribution functions (CDFs) for two distances, the first distance involves thiophene-cation interactions and the second distance comprises thiophene-anion interactions (a) [C4mim][BF<sub>4</sub>] IL and (b) [C4mim][Br] IL; the corresponding RDFs are also displayed at the top and right side of each figure. The number of occurrences was normalized.

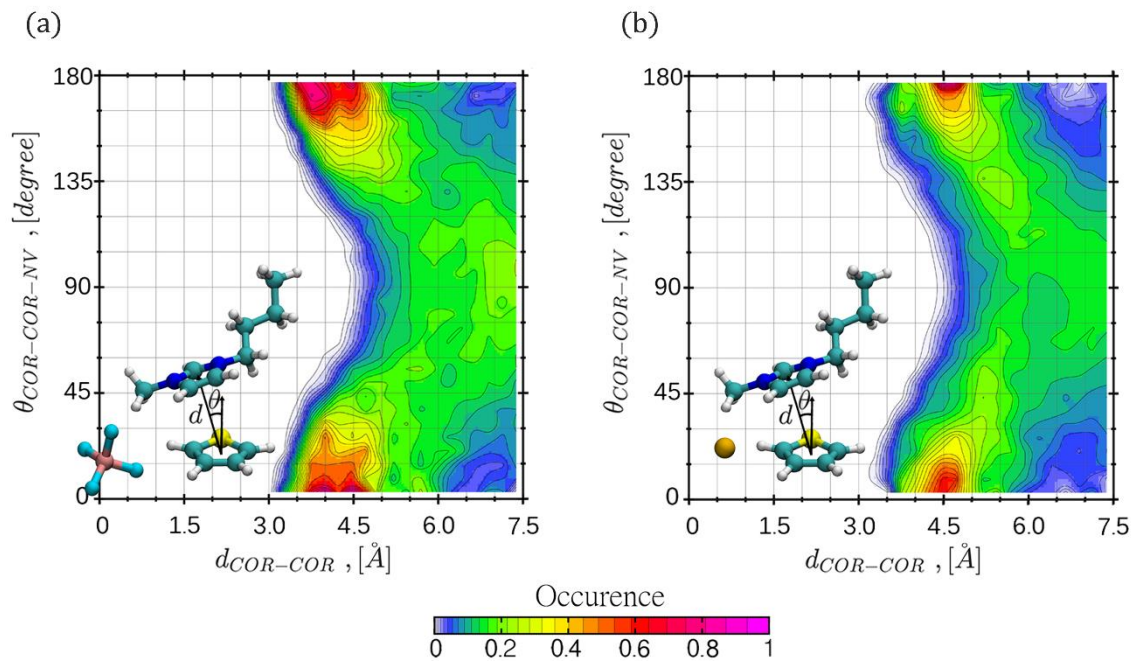

**Figure S10.** Combined distribution functions (CDF) for the center-of-ring (COR) angle  $\theta$  and distance  $d$  between thiophene and the IL cations for **(a)** [C4mim][BF<sub>4</sub>] IL and **(b)** [C4mim][Br] IL. The number of occurrences was normalized.

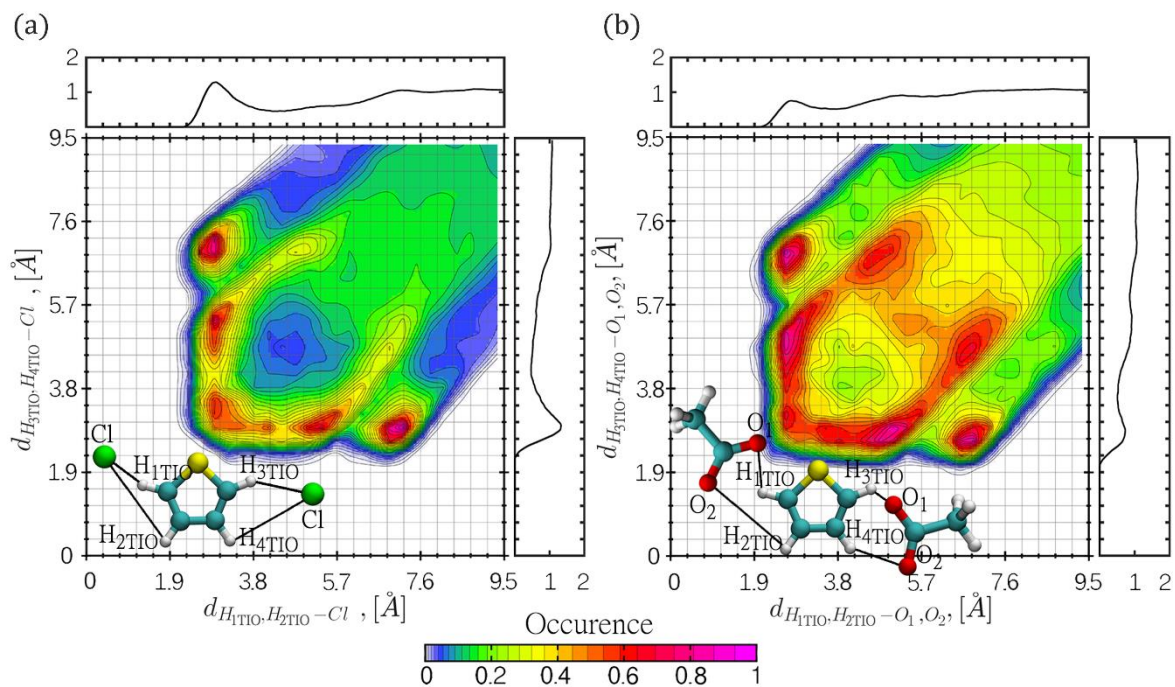

**Figure S11.** Combined distribution functions (CDFs) between hydrogen ( $H_{1-4TIO}$ ) atoms from thiophene paired with negative atoms within the IL anion **(a)**  $[C_4mim][Cl]$  IL and **(b)**  $[C_4mim][CH_3COO]$  IL. The corresponding RDFs are also displayed at the top and right sides in each figure. The number of occurrences was normalized.

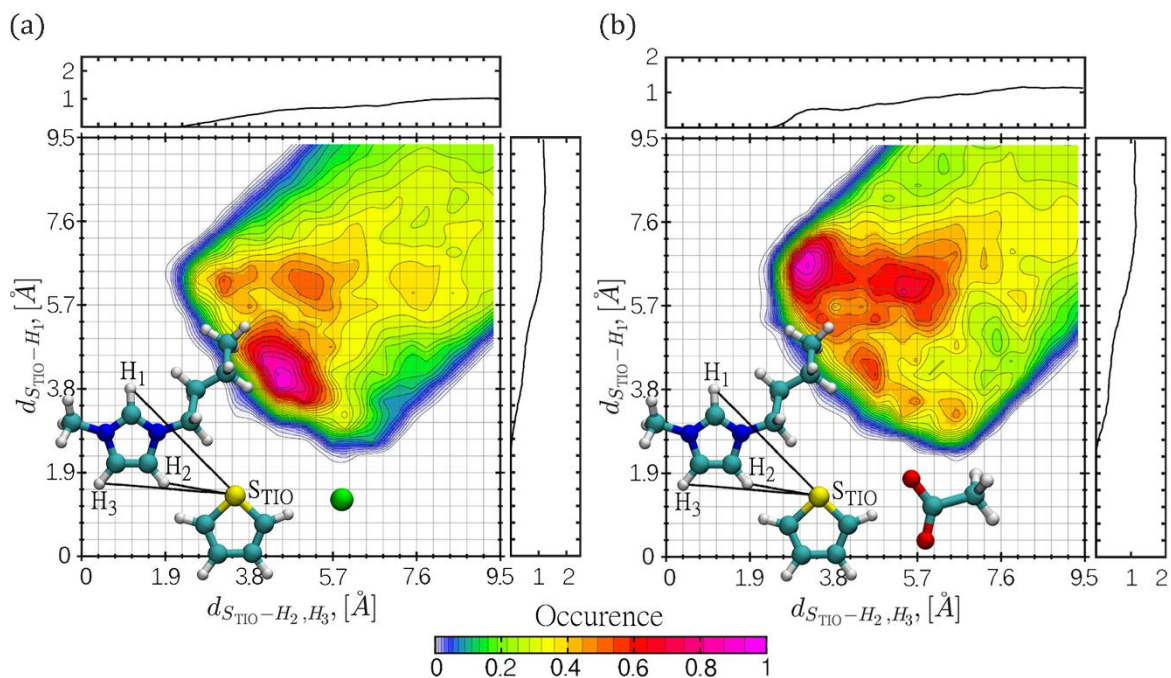

**Figure S12.** Combined distribution functions (CDFs) between the sulfur ( $S_{TIO}$ ) atom from thiophene and hydrogen atoms within the imidazolium ring for **(a)**  $[C_4mim][Cl]$  IL and **(b)**  $[C_4mim][CH_3COO]$  IL. The corresponding RDFs are also displayed at the top and right side of each figure. The number of occurrences was normalized.

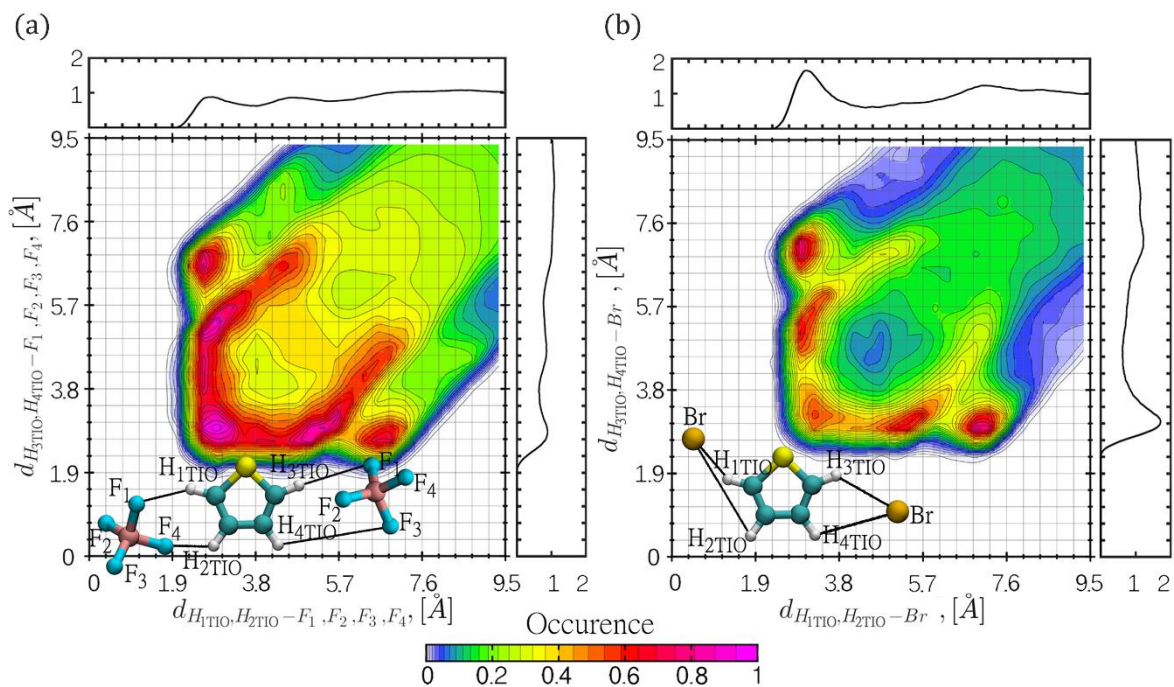

**Figure S13.** Combined distribution functions (CDFs) for the thiophene hydrogen ( $H_{1-4TIO}$ ) atoms and negative atoms within the IL anion for **(a)**  $[C_4mim][BF_4]$  IL and **(b)**  $[C_4mim][Br]$  IL. The corresponding RDFs are also displayed at the top and right sides of each figure. The number of occurrences was normalized.

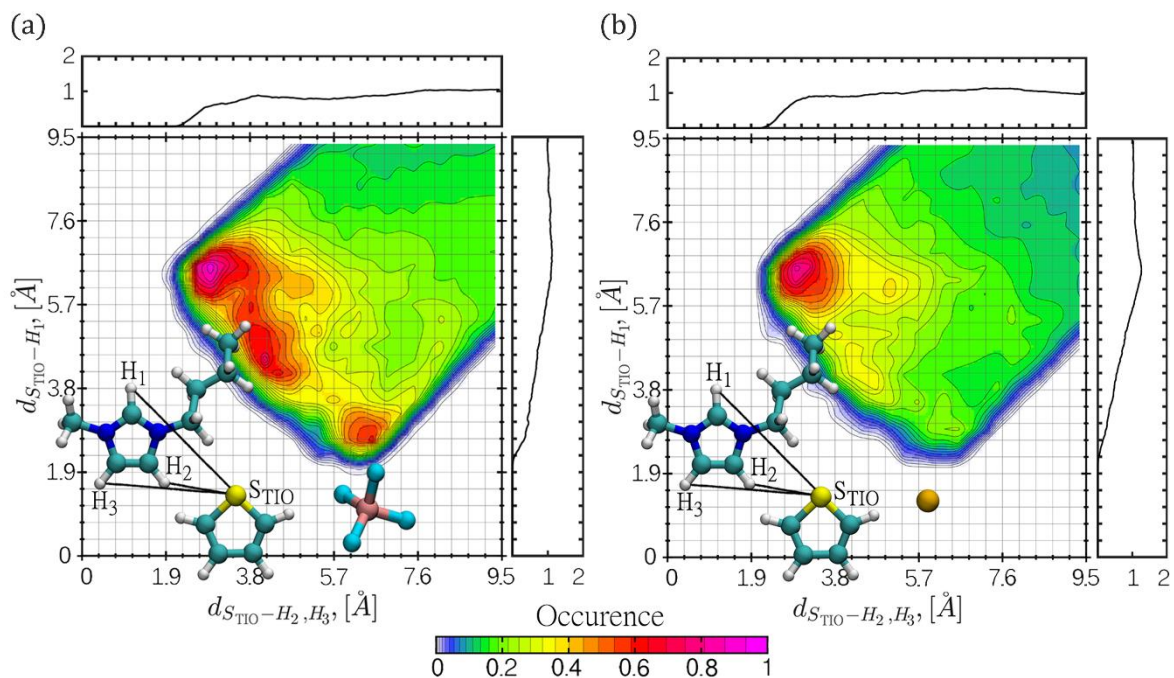

**Figure S14.** Combined distribution functions (CDFs) for thiophene sulfur ( $S_{TIO}$ ) atom and top ( $H_1$ ) and bottom ( $H_{2,3}$ ) hydrogen atoms in imidazolium ring for **(a)** [C4mim][BF<sub>4</sub>] IL and **(b)** [C4mim][Br] IL. The corresponding RDFs are also displayed at the top and right side of each figure. The number of occurrences was normalized.

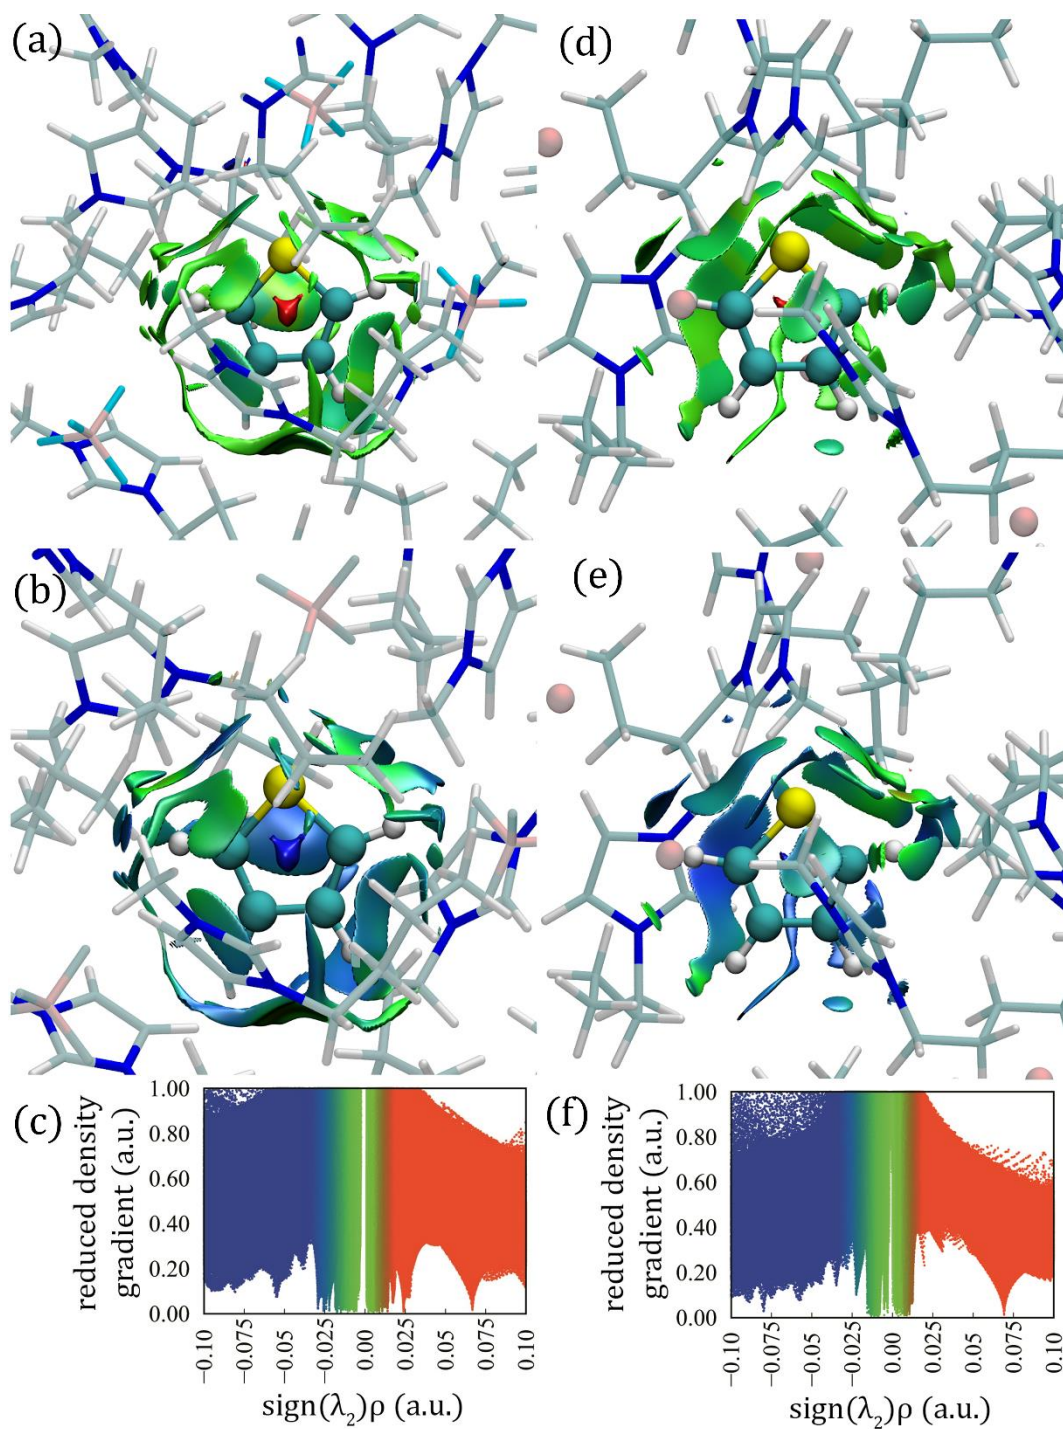

**Figure S15.** Averaged noncovalent interactions between the thiophene molecule and ILs, (a) aNCI surface, (b) TFI index, and (c) reduced electronic density gradient ( $s$ ) vs density plot in the thiophene-[C<sub>4</sub>mim][BF<sub>4</sub>] system; (d) aNCI surface, (e) TFI index and (f) reduced electronic density gradient ( $s$ ) vs density plot in the thiophene-[C<sub>4</sub>mim][Br] system. The aNCI iso-surfaces correspond to  $s=0.4$  a.u., and are colored on a BGR scale of  $-0.04 < \rho < 0.04$  a.u.; TFI iso-surfaces are colored on a BGR scale within the 0 to 1.5 range.<sup>4</sup>



## References.

1. M. Brehm, M. Thomas, S. Gehrke and B. Kirchner, *J. Chem. Phys.*, 2020, **152**, 164105.
2. M. Brehm and B. Kirchner, *J. Chem. Inf. Model.*, 2011, **51**, 2007-2023.
3. W. Humphrey, A. Dalke and K. Schulten, *J. Mol. Graph.*, 1996, **14**, 33-38.
4. T. Lu and F. Chen, *J. Comput. Chem.*, 2012, **33**, 580-592.
